# Supplementary material for: Black carbon in urban soils: land use and climate drive variation at the surface
Source: Carbon Balance Manag. 2024 Mar 2;19:9. doi: 10.1186/s13021-024-00255-3 (PMC10908174; doi:10.1186/s13021-024-00255-3)
Supplement: Supplementary file 1 — Additional file 1. Table of studies included in the literature review. [file 13021_2024_255_MOESM1_ESM.xlsx]

## Sheet: Sheet1
Author	Citation (APA)
Agarwal et al.	Agarwal, T., & Bucheli, T. D. (2011). Is black carbon a better predictor of polycyclic aromatic hydrocarbon distribution in soils than total organic carbon?. Environmental Pollution, 159(1), 64-70.
Bandowe et al.	Bandowe, B. A. M., Wei, C., Han, Y., Cao, J., Zhan, C., & Wilcke, W. (2019). Polycyclic aromatic compounds (PAHs, oxygenated PAHs, nitrated PAHs and azaarenes) in soils from China and their relationship with geographic location, land use and soil carbon fractions. Science of the Total Environment, 690, 1268-1276.
Brändli et al.	Brändli, R. C., Hartnik, T., Henriksen, T., & Cornelissen, G. (2008). Sorption of native polyaromatic hydrocarbons (PAH) to black carbon and amended activated carbon in soil. Chemosphere, 73(11), 1805-1810.
Bucheli et al.	Bucheli, T. D., Blum, F., Desaules, A., & Gustafsson, Ö. (2004). Polycyclic aromatic hydrocarbons, black carbon, and molecular markers in soils of Switzerland. Chemosphere, 56(11), 1061-1076.
Sosa et al.	Sosa, D., Hilber, I., Faure, R., Bartolomé, N., Fonseca, O., Keller, A., ... & Escobar, A. (2019). Polycyclic aromatic hydrocarbons and polychlorinated biphenyls in urban and semi-urban soils of Havana, Cuba. Journal of soils and sediments, 19, 1328-1341.
Edmondson et al.	Edmondson, J. L., Stott, I., Potter, J., Lopez-Capel, E., Manning, D. A., Gaston, K. J., & Leake, J. R. (2015). Black carbon contribution to organic carbon stocks in urban soil. Environmental science & technology, 49(14), 8339-8346.
Hamilton et al.	Hamilton, G. A., & Hartnett, H. E. (2013). Soot black carbon concentration and isotopic composition in soils from an arid urban ecosystem. Organic geochemistry, 59, 87-94.
Han et al.	Han, Y. M., Cao, J. J., Chow, J. C., Watson, J. G., An, Z. S., & Liu, S. X. (2009). Elemental carbon in urban soils and road dusts in Xi'an, China and its implication for air pollution. Atmospheric Environment, 43(15), 2464-2470.
He et al.	He, Y., & Zhang, G. L. (2009). Historical record of black carbon in urban soils and its environmental implications. Environmental Pollution, 157(10), 2684-2688.
Hussain et al.	Hussain, K., & Hoque, R. R. (2015). Seasonal attributes of urban soil PAHs of the Brahmaputra Valley. Chemosphere, 119, 794-802
Li et al.	Li, H., Chen, J., Wu, W., & Piao, X. (2010). Distribution of polycyclic aromatic hydrocarbons in different size fractions of soil from a coke oven plant and its relationship to organic carbon content. Journal of Hazardous Materials, 176(1-3), 729-734.
Li et al.	Li, X., Hou, L., Liu, M., Zheng, Y., Li, Y., & Lin, X. (2015). Abundance and diversity of polycyclic aromatic hydrocarbon degradation bacteria in urban roadside soils in Shanghai. Applied microbiology and biotechnology, 99, 3639-3649.
Lorenz et al.	Lorenz, K., Preston, C. M., & Kandeler, E. (2006). Soil organic matter in urban soils: Estimation of elemental carbon by thermal oxidation and characterization of organic matter by solid-state 13C nuclear magnetic resonance (NMR) spectroscopy. Geoderma, 130(3-4), 312-323.
Marquez-Bravo et al.	Marquez-Bravo LG, Briggs D, Shayler H, McBride M, Lopp D, Stone E, et al. Concentrations of polycyclic aromatic hydrocarbons in New York City community garden soils: Potential sources and influential factors: PAHs in New York City garden soils: Sources and influential factors. Environ Toxicol Chem. 2016 Feb;35(2):357–67.
Ran et al.	Ran, Y., Sun, K., Yang, Y., Xing, B., & Zeng, E. (2007). Strong sorption of phenanthrene by condensed organic matter in soils and sediments. Environmental Science & Technology, 41(11), 3952-3958.
Rawlins et al.	Rawlins, B. G., Vane, C. H., Kim, A. W., Tye, A. M., Kemp, S. J., & Bellamy, P. H. (2008). Methods for estimating types of soil organic carbon and their application to surveys of UK urban areas. Soil Use and Management, 24(1), 47-59.
Wang et al. (2009)	Wang, X. S. (2010). Black carbon in urban topsoils of Xuzhou (China): environmental implication and magnetic proxy. Environmental monitoring and assessment, 163, 41-47.
Wang et al. (2014)	Wang, Q., Liu, M., Yu, Y., Du, F., & Wang, X. (2014). Black carbon in soils from different land use areas of Shanghai, China: level, sources and relationship with polycyclic aromatic hydrocarbons. Applied geochemistry, 47, 36-43.
Wang et al. (2018)	Wang, C., Zhou, S., Song, J., & Wu, S. (2018). Human health risks of polycyclic aromatic hydrocarbons in the urban soils of Nanjing, China. Science of the Total Environment, 612, 750-757.
Wang et al. (2021)	Wang, C., Zhou, S., Tang, J., Li, Y., Li, H., Du, J., ... & Wu, S. (2021). Elemental carbon components and PAHs in soils from different areas of the Yangtze River Delta region, China and their relationship. Catena, 199, 105086.
Wu et al.	Wu, S., Liu, X., Liu, M., Chen, X., Liu, S., Cheng, L., ... & Li, Y. (2018). Sources, influencing factors and environmental indications of PAH pollution in urban soil columns of Shanghai, China. Ecological Indicators, 85, 1170-1180.
Xia et al.	Xia, X., Yang, L., Bu, Q., & Liu, R. (2011). Levels, distribution, and health risk of phthalate esters in urban soils of Beijing, China. Journal of environmental quality, 40(5), 1643-1651.
Yadav et al.	Yadav, I. C., Devi, N. L., Li, J., & Zhang, G. (2017). Polychlorinated biphenyls in Nepalese surface soils: Spatial distribution, air-soil exchange, and soil-air partitioning. Ecotoxicology and environmental safety, 144, 498-506.
Zong et al.	Zong, Y., Xiao, Q., & Lu, S. (2016). Black carbon (BC) of urban topsoil of steel industrial city (Anshan), Northeastern China: Concentration, source identification and environmental implication. Science of The Total Environment, 569, 990-996.
Schifman et al.	Schifman, L. A., Prues, A., Gilkey, K., & Shuster, W. D. (2018). Realizing the opportunities of black carbon in urban soils: Implications for water quality management with green infrastructure. Science of the total environment, 644, 1027-1035.
Kang et al.	Kang, K. A., Marín-Spiotta, E., Vaughan, E., Ferring, C. R., & Ponette-González, A. G. (2023). Soil Black Carbon Increases Under Urban Trees with Road Density and Time: Opportunity Hotspots for Carbon Storage in Urban Ecosystems. Environmental Management, 1-13.
